# Supplementary material
Source: HighWire-hosted journal article supplement (https://bmjopen.bmj.com/content/10/11/e035841)
Supplement: inline-supplementary-material-3 [file inline-supplementary-material-3.pdf]

Child ID Code:

|   |   |   |   |  |  |  |  |  |  |  |  |  |  |  |  |
|---|---|---|---|--|--|--|--|--|--|--|--|--|--|--|--|
| S | B | T | - |  |  |  |  |  |  |  |  |  |  |  |  |
|---|---|---|---|--|--|--|--|--|--|--|--|--|--|--|--|

| Urine and Breath Collection Form <b>Version 1.3</b>                                                                                         |                                                                                                        |                          |                                                                                                                                   |
|---------------------------------------------------------------------------------------------------------------------------------------------|--------------------------------------------------------------------------------------------------------|--------------------------|-----------------------------------------------------------------------------------------------------------------------------------|
|                                                                                                                                             | Question                                                                                               | Code                     | Response                                                                                                                          |
| 01                                                                                                                                          | Study researcher/Nurse/Fieldworker ID                                                                  |                          | <input type="text"/> <input type="text"/>                                                                                         |
| 02                                                                                                                                          | Today's date (DD/MM/YY)                                                                                |                          | <input type="text"/> <input type="text"/> / <input type="text"/> <input type="text"/> / <input type="text"/> <input type="text"/> |
| 03                                                                                                                                          | Time of arrival to Study Clinic                                                                        | Time (24 h Scale; HH:MM) | <input type="text"/> <input type="text"/> : <input type="text"/> <input type="text"/>                                             |
| <b>Screening questions</b>                                                                                                                  |                                                                                                        |                          |                                                                                                                                   |
| 04                                                                                                                                          | Diarrhea in past month                                                                                 | Yes = 01<br>No = 00      | <input type="text"/> <input type="text"/>                                                                                         |
| 05                                                                                                                                          | Antibiotics in past month                                                                              | Yes = 01<br>No = 00      | <input type="text"/> <input type="text"/>                                                                                         |
| 06                                                                                                                                          | Anti-inflammatories in past month<br>(ibuprofen, naproxen, aspirin, methenozol)<br>(paracetamol is OK) | Yes = 01<br>No = 00      | <input type="text"/> <input type="text"/>                                                                                         |
| If any of these questions (03, 04, 05) was yes, please re-schedule the test one month from the date of the diarrhea or antibiotic/NSAID use |                                                                                                        |                          |                                                                                                                                   |
| 07                                                                                                                                          | Standard meal given (rice: legume mix, egg) or breastmilk                                              | Tick                     | Idly /Kichadi/ Hard-boiled egg                                                                                                    |
| 08                                                                                                                                          | Time of completion of standard meal                                                                    | Time (24 h Scale; HH:MM) | <input type="text"/> <input type="text"/> : <input type="text"/> <input type="text"/>                                             |

| BASELINE BREATH COLLECTION |                                                                                       |                                                           |
|----------------------------|---------------------------------------------------------------------------------------|-----------------------------------------------------------|
| Breath sample tube number  | Time of completion                                                                    | Comments (note crying, difficult sample collection, etc.) |
| Baseline                   | <input type="text"/> <input type="text"/> : <input type="text"/> <input type="text"/> |                                                           |

| BASELINE URINE COLLECTION (LR and D <sub>2</sub> O) |                        |                                                                                       |                                     |
|-----------------------------------------------------|------------------------|---------------------------------------------------------------------------------------|-------------------------------------|
| Urinary collection Time*                            | Collection Volume (mL) | Time of Collection                                                                    | Comments (please note any spillage) |
| Baseline                                            |                        | <input type="text"/> <input type="text"/> : <input type="text"/> <input type="text"/> |                                     |

\*Use baseline urine for LR and Body composition (D<sub>2</sub>O)

| DO NOT ADMINISTER SUGAR SOLUTION UNTIL THE CHILD HAS FULLY VOIDED THEIR BLADDER AND THE TIME IS 1 HOUR FROM THE LAST MEAL |  |                                                                                       |
|---------------------------------------------------------------------------------------------------------------------------|--|---------------------------------------------------------------------------------------|
| Vial label of <sup>13</sup> C <sub>12</sub> -sucrose solution                                                             |  |                                                                                       |
| Time the <sup>13</sup> C <sub>12</sub> -sucrose was first consumed:                                                       |  | <input type="text"/> <input type="text"/> : <input type="text"/> <input type="text"/> |
| Total volume (mL) of sucrose solution consumed                                                                            |  | <input type="text"/> <input type="text"/>                                             |
| Total volume (mL) of chaser consumed                                                                                      |  | <input type="text"/> <input type="text"/>                                             |
| Time the LR solution was consumed:                                                                                        |  | Start time: __ : __      End time: __ : __                                            |
| Total volume (mL) of LR solution consumed                                                                                 |  | <input type="text"/> <input type="text"/>                                             |
| Total volume (mL) of chaser consumed                                                                                      |  | <input type="text"/> <input type="text"/>                                             |

Child ID Code:

|   |   |   |   |  |  |  |  |  |  |  |  |  |  |  |  |
|---|---|---|---|--|--|--|--|--|--|--|--|--|--|--|--|
| S | B | T | - |  |  |  |  |  |  |  |  |  |  |  |  |
|---|---|---|---|--|--|--|--|--|--|--|--|--|--|--|--|

|                                                                                                                                                                                                                                              |                                                              |                                           |                                                                                                  |                                                                       |                                                                |                                               |
|----------------------------------------------------------------------------------------------------------------------------------------------------------------------------------------------------------------------------------------------|--------------------------------------------------------------|-------------------------------------------|--------------------------------------------------------------------------------------------------|-----------------------------------------------------------------------|----------------------------------------------------------------|-----------------------------------------------|
| How many minutes did it take the child to consume the LR solution in full?                                                                                                                                                                   |                                                              | 01-20 minutes                             |                                                                                                  |                                                                       |                                                                |                                               |
| Was the LR solution consumed in full?<br><i>Weight of pre-weighed tissue =</i><br><i>Weight of soaked tissue =</i>                                                                                                                           |                                                              | Yes = 01<br>No = 00                       |                                                                                                  |                                                                       |                                                                |                                               |
| <i>If the child spits out, vomits, or fails to swallow all the sugar solution, the test cannot be completed. Please stop and re-schedule the test for another day.</i>                                                                       |                                                              |                                           |                                                                                                  |                                                                       |                                                                |                                               |
| Total volume (mL) of deuterium water consumed                                                                                                                                                                                                |                                                              |                                           |                                                                                                  |                                                                       |                                                                |                                               |
| Total volume (mL) of chaser consumed                                                                                                                                                                                                         |                                                              |                                           |                                                                                                  |                                                                       |                                                                |                                               |
| Was the deuterium dose consumed in full?<br><i>Weight of pre-weighed tissue =</i><br><i>Weight of soaked tissue =</i>                                                                                                                        |                                                              | Yes = 01<br>No = 00                       |                                                                                                  |                                                                       |                                                                |                                               |
| <i>A pre-weighed napkin should be placed under the neck to collect any spill from the dose. This should be weighed immediately after or placed in a small airtight container to avoid evaporation if immediate weighing is not possible.</i> |                                                              |                                           |                                                                                                  |                                                                       |                                                                |                                               |
| <i>Start collection: Encourage the child to drink water throughout the test.</i>                                                                                                                                                             |                                                              |                                           |                                                                                                  |                                                                       |                                                                |                                               |
| <b>Breath sample tube time</b>                                                                                                                                                                                                               | <b>Exact collection time</b><br>(use a stopwatch in minutes) | <b>Comments</b><br>(child was crying Y/N) | <b>Urinary collection Time</b>                                                                   | <b>Collection Volume (mL)</b>                                         | <b>Exact collection time</b><br>(using a stopwatch in minutes) | <b>Comments</b><br>(please note any spillage) |
| 15 minutes                                                                                                                                                                                                                                   |                                                              |                                           | <i>Do not collect urine for the first 30 minutes after the child consumes the sugar solution</i> |                                                                       |                                                                |                                               |
| 30 minutes                                                                                                                                                                                                                                   |                                                              |                                           |                                                                                                  |                                                                       |                                                                |                                               |
| 45 minutes                                                                                                                                                                                                                                   |                                                              |                                           | 30 to 90 minutes                                                                                 |                                                                       |                                                                |                                               |
| 60 minutes                                                                                                                                                                                                                                   |                                                              |                                           |                                                                                                  |                                                                       |                                                                |                                               |
| 75 minutes                                                                                                                                                                                                                                   |                                                              |                                           |                                                                                                  |                                                                       |                                                                |                                               |
| 90 minutes                                                                                                                                                                                                                                   |                                                              |                                           |                                                                                                  |                                                                       |                                                                |                                               |
| <i>At this time, please give the child the standardized meal</i>                                                                                                                                                                             |                                                              |                                           |                                                                                                  |                                                                       |                                                                |                                               |
| Standard meal given (rice: legume mix, egg) or breastmilk                                                                                                                                                                                    |                                                              |                                           | Tick                                                                                             | Idly /Kichadi/ Hard-boiled egg/ milk without sugar/ milk + beet sugar |                                                                |                                               |
| Time of consumption of standard meal                                                                                                                                                                                                         |                                                              |                                           | Time (24 h Scale; HH:MM)                                                                         |                                                                       |                                                                |                                               |
| 120 minutes                                                                                                                                                                                                                                  |                                                              |                                           | 90 to 120 minutes                                                                                |                                                                       |                                                                |                                               |
| 150 minutes                                                                                                                                                                                                                                  |                                                              |                                           | 120 to 300 minutes                                                                               |                                                                       |                                                                |                                               |
| 180 minutes                                                                                                                                                                                                                                  |                                                              |                                           |                                                                                                  |                                                                       |                                                                |                                               |
| Urine                                                                                                                                                                                                                                        |                                                              |                                           |                                                                                                  |                                                                       |                                                                |                                               |
| 210 minutes                                                                                                                                                                                                                                  |                                                              |                                           |                                                                                                  |                                                                       |                                                                |                                               |
| 240 minutes                                                                                                                                                                                                                                  |                                                              |                                           |                                                                                                  |                                                                       |                                                                |                                               |
|                                                                                                                                                                                                                                              |                                                              |                                           |                                                                                                  |                                                                       |                                                                |                                               |
| Total:                                                                                                                                                                                                                                       |                                                              |                                           |                                                                                                  |                                                                       |                                                                |                                               |

Child ID Code:

|   |   |   |   |  |  |  |  |  |  |  |  |  |  |  |  |
|---|---|---|---|--|--|--|--|--|--|--|--|--|--|--|--|
| S | B | T | - |  |  |  |  |  |  |  |  |  |  |  |  |
|---|---|---|---|--|--|--|--|--|--|--|--|--|--|--|--|

|                                                 |                                                                                                                                                                         |                                                                                                            |                                                                                                            |
|-------------------------------------------------|-------------------------------------------------------------------------------------------------------------------------------------------------------------------------|------------------------------------------------------------------------------------------------------------|------------------------------------------------------------------------------------------------------------|
| 09                                              | How many loose stools were passed during the breath/urine collection?                                                                                                   | Range<br>(00-15,<br>NA)                                                                                    | <input type="text"/> <input type="text"/>                                                                  |
| 10                                              | Did any breastfeeding occur in the first 90 minutes of the test?<br>(if the mother needed to comfort the child)                                                         | Yes = 01<br>No = 00                                                                                        | <input type="text"/> <input type="text"/>                                                                  |
| 11                                              | Did the child consume any non-breastmilk liquids or foods during the first 90 minutes of the test?<br>(excluding water, which should be encouraged throughout the test) | Yes = 01<br>No = 00                                                                                        | <input type="text"/> <input type="text"/>                                                                  |
| 12                                              | Weight of sipper with water at start of experiment (g)                                                                                                                  |                                                                                                            | <input type="text"/> <input type="text"/> <input type="text"/>                                             |
| 13                                              | Weight of sipper with water at end of experiment (g)                                                                                                                    |                                                                                                            | <input type="text"/> <input type="text"/> <input type="text"/>                                             |
| Anthropometry (take measurement in triplicates) |                                                                                                                                                                         |                                                                                                            |                                                                                                            |
| 1                                               | Height (cm)                                                                                                                                                             | <input type="text"/> <input type="text"/> . <input type="text"/>                                           | <input type="text"/> <input type="text"/> . <input type="text"/>                                           |
| 2                                               | Weight (kg)                                                                                                                                                             | <input type="text"/> <input type="text"/> . <input type="text"/> <input type="text"/> <input type="text"/> | <input type="text"/> <input type="text"/> . <input type="text"/> <input type="text"/> <input type="text"/> |
| 3                                               | Head circumference (cm)                                                                                                                                                 | <input type="text"/> <input type="text"/> . <input type="text"/>                                           | <input type="text"/> <input type="text"/> . <input type="text"/>                                           |
| 4                                               | MUAC (cm)                                                                                                                                                               | <input type="text"/> <input type="text"/> . <input type="text"/>                                           | <input type="text"/> <input type="text"/> . <input type="text"/>                                           |

Child ID Code:

|  |  |  |  |  |  |  |
|--|--|--|--|--|--|--|
|  |  |  |  |  |  |  |
|--|--|--|--|--|--|--|

| Breath Sample Reception in Laboratory <b>Version 1.0</b> |                                              |                                                                                                                                                                                                                                                                                                                                                                                                                                                                                                                                                                                                                                                                                                                                                                                                                                                                                                                                                                                                                                                                                                                                                                                                                                                                                                                                                                              |                                                                                                                                                                       |                                             |                                             |                                             |                                             |                                             |                                             |                                             |                                             |                                             |                                             |                                             |                                             |                                              |                                              |                                              |                                              |                                              |                                              |                                              |                                              |                                              |                                              |
|----------------------------------------------------------|----------------------------------------------|------------------------------------------------------------------------------------------------------------------------------------------------------------------------------------------------------------------------------------------------------------------------------------------------------------------------------------------------------------------------------------------------------------------------------------------------------------------------------------------------------------------------------------------------------------------------------------------------------------------------------------------------------------------------------------------------------------------------------------------------------------------------------------------------------------------------------------------------------------------------------------------------------------------------------------------------------------------------------------------------------------------------------------------------------------------------------------------------------------------------------------------------------------------------------------------------------------------------------------------------------------------------------------------------------------------------------------------------------------------------------|-----------------------------------------------------------------------------------------------------------------------------------------------------------------------|---------------------------------------------|---------------------------------------------|---------------------------------------------|---------------------------------------------|---------------------------------------------|---------------------------------------------|---------------------------------------------|---------------------------------------------|---------------------------------------------|---------------------------------------------|---------------------------------------------|---------------------------------------------|----------------------------------------------|----------------------------------------------|----------------------------------------------|----------------------------------------------|----------------------------------------------|----------------------------------------------|----------------------------------------------|----------------------------------------------|----------------------------------------------|----------------------------------------------|
|                                                          | Question                                     | Code                                                                                                                                                                                                                                                                                                                                                                                                                                                                                                                                                                                                                                                                                                                                                                                                                                                                                                                                                                                                                                                                                                                                                                                                                                                                                                                                                                         | Response                                                                                                                                                              |                                             |                                             |                                             |                                             |                                             |                                             |                                             |                                             |                                             |                                             |                                             |                                             |                                              |                                              |                                              |                                              |                                              |                                              |                                              |                                              |                                              |                                              |
| 01                                                       | Study researcher/ Nurse/ Fieldworker ID      |                                                                                                                                                                                                                                                                                                                                                                                                                                                                                                                                                                                                                                                                                                                                                                                                                                                                                                                                                                                                                                                                                                                                                                                                                                                                                                                                                                              | <table border="1"><tr><td></td><td></td><td></td></tr></table>                                                                                                        |                                             |                                             |                                             |                                             |                                             |                                             |                                             |                                             |                                             |                                             |                                             |                                             |                                              |                                              |                                              |                                              |                                              |                                              |                                              |                                              |                                              |                                              |
|                                                          |                                              |                                                                                                                                                                                                                                                                                                                                                                                                                                                                                                                                                                                                                                                                                                                                                                                                                                                                                                                                                                                                                                                                                                                                                                                                                                                                                                                                                                              |                                                                                                                                                                       |                                             |                                             |                                             |                                             |                                             |                                             |                                             |                                             |                                             |                                             |                                             |                                             |                                              |                                              |                                              |                                              |                                              |                                              |                                              |                                              |                                              |                                              |
| 02                                                       | Today's date (DD/MMM/YY)                     |                                                                                                                                                                                                                                                                                                                                                                                                                                                                                                                                                                                                                                                                                                                                                                                                                                                                                                                                                                                                                                                                                                                                                                                                                                                                                                                                                                              | <table border="1"><tr><td></td><td></td></tr></table> / <table border="1"><tr><td></td><td></td></tr></table> / <table border="1"><tr><td></td><td></td></tr></table> |                                             |                                             |                                             |                                             |                                             |                                             |                                             |                                             |                                             |                                             |                                             |                                             |                                              |                                              |                                              |                                              |                                              |                                              |                                              |                                              |                                              |                                              |
|                                                          |                                              |                                                                                                                                                                                                                                                                                                                                                                                                                                                                                                                                                                                                                                                                                                                                                                                                                                                                                                                                                                                                                                                                                                                                                                                                                                                                                                                                                                              |                                                                                                                                                                       |                                             |                                             |                                             |                                             |                                             |                                             |                                             |                                             |                                             |                                             |                                             |                                             |                                              |                                              |                                              |                                              |                                              |                                              |                                              |                                              |                                              |                                              |
|                                                          |                                              |                                                                                                                                                                                                                                                                                                                                                                                                                                                                                                                                                                                                                                                                                                                                                                                                                                                                                                                                                                                                                                                                                                                                                                                                                                                                                                                                                                              |                                                                                                                                                                       |                                             |                                             |                                             |                                             |                                             |                                             |                                             |                                             |                                             |                                             |                                             |                                             |                                              |                                              |                                              |                                              |                                              |                                              |                                              |                                              |                                              |                                              |
|                                                          |                                              |                                                                                                                                                                                                                                                                                                                                                                                                                                                                                                                                                                                                                                                                                                                                                                                                                                                                                                                                                                                                                                                                                                                                                                                                                                                                                                                                                                              |                                                                                                                                                                       |                                             |                                             |                                             |                                             |                                             |                                             |                                             |                                             |                                             |                                             |                                             |                                             |                                              |                                              |                                              |                                              |                                              |                                              |                                              |                                              |                                              |                                              |
| 03                                                       | Sample ID:                                   |                                                                                                                                                                                                                                                                                                                                                                                                                                                                                                                                                                                                                                                                                                                                                                                                                                                                                                                                                                                                                                                                                                                                                                                                                                                                                                                                                                              |                                                                                                                                                                       |                                             |                                             |                                             |                                             |                                             |                                             |                                             |                                             |                                             |                                             |                                             |                                             |                                              |                                              |                                              |                                              |                                              |                                              |                                              |                                              |                                              |                                              |
| 04                                                       | Time of arrival of sample at laboratory      | Time (24 Hr Scale; HH:MM)                                                                                                                                                                                                                                                                                                                                                                                                                                                                                                                                                                                                                                                                                                                                                                                                                                                                                                                                                                                                                                                                                                                                                                                                                                                                                                                                                    | <table border="1"><tr><td></td><td></td></tr></table> : <table border="1"><tr><td></td><td></td></tr></table>                                                         |                                             |                                             |                                             |                                             |                                             |                                             |                                             |                                             |                                             |                                             |                                             |                                             |                                              |                                              |                                              |                                              |                                              |                                              |                                              |                                              |                                              |                                              |
|                                                          |                                              |                                                                                                                                                                                                                                                                                                                                                                                                                                                                                                                                                                                                                                                                                                                                                                                                                                                                                                                                                                                                                                                                                                                                                                                                                                                                                                                                                                              |                                                                                                                                                                       |                                             |                                             |                                             |                                             |                                             |                                             |                                             |                                             |                                             |                                             |                                             |                                             |                                              |                                              |                                              |                                              |                                              |                                              |                                              |                                              |                                              |                                              |
|                                                          |                                              |                                                                                                                                                                                                                                                                                                                                                                                                                                                                                                                                                                                                                                                                                                                                                                                                                                                                                                                                                                                                                                                                                                                                                                                                                                                                                                                                                                              |                                                                                                                                                                       |                                             |                                             |                                             |                                             |                                             |                                             |                                             |                                             |                                             |                                             |                                             |                                             |                                              |                                              |                                              |                                              |                                              |                                              |                                              |                                              |                                              |                                              |
| 05                                                       | Please confirm that each sample is complete: | <table border="0"> <tr> <td><input type="checkbox"/> 15-minute sample A</td> <td><input type="checkbox"/> 15-minute sample B</td> </tr> <tr> <td><input type="checkbox"/> 30-minute sample A</td> <td><input type="checkbox"/> 30-minute sample B</td> </tr> <tr> <td><input type="checkbox"/> 45-minute sample A</td> <td><input type="checkbox"/> 45-minute sample B</td> </tr> <tr> <td><input type="checkbox"/> 60-minute sample A</td> <td><input type="checkbox"/> 60-minute sample B</td> </tr> <tr> <td><input type="checkbox"/> 75-minute sample A</td> <td><input type="checkbox"/> 75-minute sample B</td> </tr> <tr> <td><input type="checkbox"/> 90-minute sample A</td> <td><input type="checkbox"/> 90-minute sample B</td> </tr> <tr> <td><input type="checkbox"/> 120-minute sample A</td> <td><input type="checkbox"/> 120-minute sample B</td> </tr> <tr> <td><input type="checkbox"/> 150-minute sample A</td> <td><input type="checkbox"/> 150-minute sample B</td> </tr> <tr> <td><input type="checkbox"/> 180-minute sample A</td> <td><input type="checkbox"/> 180-minute sample B</td> </tr> <tr> <td><input type="checkbox"/> 210-minute sample A</td> <td><input type="checkbox"/> 210-minute sample B</td> </tr> <tr> <td><input type="checkbox"/> 240-minute sample A</td> <td><input type="checkbox"/> 240-minute sample B</td> </tr> </table> |                                                                                                                                                                       | <input type="checkbox"/> 15-minute sample A | <input type="checkbox"/> 15-minute sample B | <input type="checkbox"/> 30-minute sample A | <input type="checkbox"/> 30-minute sample B | <input type="checkbox"/> 45-minute sample A | <input type="checkbox"/> 45-minute sample B | <input type="checkbox"/> 60-minute sample A | <input type="checkbox"/> 60-minute sample B | <input type="checkbox"/> 75-minute sample A | <input type="checkbox"/> 75-minute sample B | <input type="checkbox"/> 90-minute sample A | <input type="checkbox"/> 90-minute sample B | <input type="checkbox"/> 120-minute sample A | <input type="checkbox"/> 120-minute sample B | <input type="checkbox"/> 150-minute sample A | <input type="checkbox"/> 150-minute sample B | <input type="checkbox"/> 180-minute sample A | <input type="checkbox"/> 180-minute sample B | <input type="checkbox"/> 210-minute sample A | <input type="checkbox"/> 210-minute sample B | <input type="checkbox"/> 240-minute sample A | <input type="checkbox"/> 240-minute sample B |
| <input type="checkbox"/> 15-minute sample A              | <input type="checkbox"/> 15-minute sample B  |                                                                                                                                                                                                                                                                                                                                                                                                                                                                                                                                                                                                                                                                                                                                                                                                                                                                                                                                                                                                                                                                                                                                                                                                                                                                                                                                                                              |                                                                                                                                                                       |                                             |                                             |                                             |                                             |                                             |                                             |                                             |                                             |                                             |                                             |                                             |                                             |                                              |                                              |                                              |                                              |                                              |                                              |                                              |                                              |                                              |                                              |
| <input type="checkbox"/> 30-minute sample A              | <input type="checkbox"/> 30-minute sample B  |                                                                                                                                                                                                                                                                                                                                                                                                                                                                                                                                                                                                                                                                                                                                                                                                                                                                                                                                                                                                                                                                                                                                                                                                                                                                                                                                                                              |                                                                                                                                                                       |                                             |                                             |                                             |                                             |                                             |                                             |                                             |                                             |                                             |                                             |                                             |                                             |                                              |                                              |                                              |                                              |                                              |                                              |                                              |                                              |                                              |                                              |
| <input type="checkbox"/> 45-minute sample A              | <input type="checkbox"/> 45-minute sample B  |                                                                                                                                                                                                                                                                                                                                                                                                                                                                                                                                                                                                                                                                                                                                                                                                                                                                                                                                                                                                                                                                                                                                                                                                                                                                                                                                                                              |                                                                                                                                                                       |                                             |                                             |                                             |                                             |                                             |                                             |                                             |                                             |                                             |                                             |                                             |                                             |                                              |                                              |                                              |                                              |                                              |                                              |                                              |                                              |                                              |                                              |
| <input type="checkbox"/> 60-minute sample A              | <input type="checkbox"/> 60-minute sample B  |                                                                                                                                                                                                                                                                                                                                                                                                                                                                                                                                                                                                                                                                                                                                                                                                                                                                                                                                                                                                                                                                                                                                                                                                                                                                                                                                                                              |                                                                                                                                                                       |                                             |                                             |                                             |                                             |                                             |                                             |                                             |                                             |                                             |                                             |                                             |                                             |                                              |                                              |                                              |                                              |                                              |                                              |                                              |                                              |                                              |                                              |
| <input type="checkbox"/> 75-minute sample A              | <input type="checkbox"/> 75-minute sample B  |                                                                                                                                                                                                                                                                                                                                                                                                                                                                                                                                                                                                                                                                                                                                                                                                                                                                                                                                                                                                                                                                                                                                                                                                                                                                                                                                                                              |                                                                                                                                                                       |                                             |                                             |                                             |                                             |                                             |                                             |                                             |                                             |                                             |                                             |                                             |                                             |                                              |                                              |                                              |                                              |                                              |                                              |                                              |                                              |                                              |                                              |
| <input type="checkbox"/> 90-minute sample A              | <input type="checkbox"/> 90-minute sample B  |                                                                                                                                                                                                                                                                                                                                                                                                                                                                                                                                                                                                                                                                                                                                                                                                                                                                                                                                                                                                                                                                                                                                                                                                                                                                                                                                                                              |                                                                                                                                                                       |                                             |                                             |                                             |                                             |                                             |                                             |                                             |                                             |                                             |                                             |                                             |                                             |                                              |                                              |                                              |                                              |                                              |                                              |                                              |                                              |                                              |                                              |
| <input type="checkbox"/> 120-minute sample A             | <input type="checkbox"/> 120-minute sample B |                                                                                                                                                                                                                                                                                                                                                                                                                                                                                                                                                                                                                                                                                                                                                                                                                                                                                                                                                                                                                                                                                                                                                                                                                                                                                                                                                                              |                                                                                                                                                                       |                                             |                                             |                                             |                                             |                                             |                                             |                                             |                                             |                                             |                                             |                                             |                                             |                                              |                                              |                                              |                                              |                                              |                                              |                                              |                                              |                                              |                                              |
| <input type="checkbox"/> 150-minute sample A             | <input type="checkbox"/> 150-minute sample B |                                                                                                                                                                                                                                                                                                                                                                                                                                                                                                                                                                                                                                                                                                                                                                                                                                                                                                                                                                                                                                                                                                                                                                                                                                                                                                                                                                              |                                                                                                                                                                       |                                             |                                             |                                             |                                             |                                             |                                             |                                             |                                             |                                             |                                             |                                             |                                             |                                              |                                              |                                              |                                              |                                              |                                              |                                              |                                              |                                              |                                              |
| <input type="checkbox"/> 180-minute sample A             | <input type="checkbox"/> 180-minute sample B |                                                                                                                                                                                                                                                                                                                                                                                                                                                                                                                                                                                                                                                                                                                                                                                                                                                                                                                                                                                                                                                                                                                                                                                                                                                                                                                                                                              |                                                                                                                                                                       |                                             |                                             |                                             |                                             |                                             |                                             |                                             |                                             |                                             |                                             |                                             |                                             |                                              |                                              |                                              |                                              |                                              |                                              |                                              |                                              |                                              |                                              |
| <input type="checkbox"/> 210-minute sample A             | <input type="checkbox"/> 210-minute sample B |                                                                                                                                                                                                                                                                                                                                                                                                                                                                                                                                                                                                                                                                                                                                                                                                                                                                                                                                                                                                                                                                                                                                                                                                                                                                                                                                                                              |                                                                                                                                                                       |                                             |                                             |                                             |                                             |                                             |                                             |                                             |                                             |                                             |                                             |                                             |                                             |                                              |                                              |                                              |                                              |                                              |                                              |                                              |                                              |                                              |                                              |
| <input type="checkbox"/> 240-minute sample A             | <input type="checkbox"/> 240-minute sample B |                                                                                                                                                                                                                                                                                                                                                                                                                                                                                                                                                                                                                                                                                                                                                                                                                                                                                                                                                                                                                                                                                                                                                                                                                                                                                                                                                                              |                                                                                                                                                                       |                                             |                                             |                                             |                                             |                                             |                                             |                                             |                                             |                                             |                                             |                                             |                                             |                                              |                                              |                                              |                                              |                                              |                                              |                                              |                                              |                                              |                                              |
| 06                                                       | Notes:                                       |                                                                                                                                                                                                                                                                                                                                                                                                                                                                                                                                                                                                                                                                                                                                                                                                                                                                                                                                                                                                                                                                                                                                                                                                                                                                                                                                                                              |                                                                                                                                                                       |                                             |                                             |                                             |                                             |                                             |                                             |                                             |                                             |                                             |                                             |                                             |                                             |                                              |                                              |                                              |                                              |                                              |                                              |                                              |                                              |                                              |                                              |

*Breath samples should be labeled as follows:* Study code + site code + participant code + timepoint + replicate identifier (A or B) e.g. SBT-ZAM1-P1-T60-A

Child ID Code:

|  |  |  |  |  |  |  |  |
|--|--|--|--|--|--|--|--|
|  |  |  |  |  |  |  |  |
|--|--|--|--|--|--|--|--|

| Urine Reception in Laboratory <b>Version 1.0</b> |                                                                                                                             |                           |                                                                                                                                                                       |  |  |  |  |  |  |
|--------------------------------------------------|-----------------------------------------------------------------------------------------------------------------------------|---------------------------|-----------------------------------------------------------------------------------------------------------------------------------------------------------------------|--|--|--|--|--|--|
|                                                  | Question                                                                                                                    | Code                      | Response                                                                                                                                                              |  |  |  |  |  |  |
| 01                                               | Study researcher/ Nurse/ Fieldworker ID                                                                                     |                           | <table border="1"><tr><td></td><td></td><td></td></tr></table>                                                                                                        |  |  |  |  |  |  |
|                                                  |                                                                                                                             |                           |                                                                                                                                                                       |  |  |  |  |  |  |
| 02                                               | Today's date (DD/MMM/YY)                                                                                                    |                           | <table border="1"><tr><td></td><td></td></tr></table> / <table border="1"><tr><td></td><td></td></tr></table> / <table border="1"><tr><td></td><td></td></tr></table> |  |  |  |  |  |  |
|                                                  |                                                                                                                             |                           |                                                                                                                                                                       |  |  |  |  |  |  |
|                                                  |                                                                                                                             |                           |                                                                                                                                                                       |  |  |  |  |  |  |
|                                                  |                                                                                                                             |                           |                                                                                                                                                                       |  |  |  |  |  |  |
| 03                                               | Sample ID:                                                                                                                  |                           |                                                                                                                                                                       |  |  |  |  |  |  |
| 04                                               | Time of arrival of sample at laboratory                                                                                     | Time (24 Hr Scale; HH:MM) | <table border="1"><tr><td></td><td></td></tr></table> : <table border="1"><tr><td></td><td></td></tr></table>                                                         |  |  |  |  |  |  |
|                                                  |                                                                                                                             |                           |                                                                                                                                                                       |  |  |  |  |  |  |
|                                                  |                                                                                                                             |                           |                                                                                                                                                                       |  |  |  |  |  |  |
| 05                                               | Number of aliquots of urine collected from 30 - 90 minutes (should be 4 aliquots of 250 µL)                                 | 01-04                     | <table border="1"><tr><td></td><td></td></tr></table>                                                                                                                 |  |  |  |  |  |  |
|                                                  |                                                                                                                             |                           |                                                                                                                                                                       |  |  |  |  |  |  |
| 06                                               | Number of aliquots of urine collected from 90 minutes to 120 minutes (should be 2 aliquots of 250 µL)                       | 01-02                     | <table border="1"><tr><td></td><td></td></tr></table>                                                                                                                 |  |  |  |  |  |  |
|                                                  |                                                                                                                             |                           |                                                                                                                                                                       |  |  |  |  |  |  |
| 07                                               | Number of aliquots of urine collected from 120 minutes to 300 minutes (should be 2 aliquots of 250 µL) <i>If applicable</i> | 01-02                     | <table border="1"><tr><td></td><td></td></tr></table>                                                                                                                 |  |  |  |  |  |  |
|                                                  |                                                                                                                             |                           |                                                                                                                                                                       |  |  |  |  |  |  |
| 08                                               | Notes:                                                                                                                      |                           |                                                                                                                                                                       |  |  |  |  |  |  |

*Urine samples should be labeled as follows:* Study code + site code + participant code + timepoint (in minutes, from start time) + replicate identifier (A, B, C, D)

e.g. 30-90-minute urine: SBT-ZAM1-P001-T30-A

90-120-minute urine: SBT-ZAM1-P001-T90-A

120-300-minute urine: SBT-ZAM1-P001-T120-A

Child ID Code:

|  |  |  |  |  |  |  |  |
|--|--|--|--|--|--|--|--|
|  |  |  |  |  |  |  |  |
|--|--|--|--|--|--|--|--|

| Blood Sample Collection <b>Version 1.0</b><br>(6 hours postprandial)     |                                                                                                                                      |                           |                                                                                                                                                                       |  |  |  |  |  |  |
|--------------------------------------------------------------------------|--------------------------------------------------------------------------------------------------------------------------------------|---------------------------|-----------------------------------------------------------------------------------------------------------------------------------------------------------------------|--|--|--|--|--|--|
|                                                                          | Question                                                                                                                             | Code                      | Response                                                                                                                                                              |  |  |  |  |  |  |
| 01                                                                       | Study researcher/ Nurse/ Fieldworker ID                                                                                              |                           | <table border="1"><tr><td></td><td></td><td></td></tr></table>                                                                                                        |  |  |  |  |  |  |
|                                                                          |                                                                                                                                      |                           |                                                                                                                                                                       |  |  |  |  |  |  |
| 02                                                                       | Today's date (DD/MMM/YY)                                                                                                             |                           | <table border="1"><tr><td></td><td></td></tr></table> / <table border="1"><tr><td></td><td></td></tr></table> / <table border="1"><tr><td></td><td></td></tr></table> |  |  |  |  |  |  |
|                                                                          |                                                                                                                                      |                           |                                                                                                                                                                       |  |  |  |  |  |  |
|                                                                          |                                                                                                                                      |                           |                                                                                                                                                                       |  |  |  |  |  |  |
|                                                                          |                                                                                                                                      |                           |                                                                                                                                                                       |  |  |  |  |  |  |
| 03                                                                       | Before starting the test, when was the last time the child ate (either breastmilk or solid foods) (post prandial for how many hours) | Time (24 Hr Scale; HH:MM) | <table border="1"><tr><td></td><td></td></tr></table> : <table border="1"><tr><td></td><td></td></tr></table>                                                         |  |  |  |  |  |  |
|                                                                          |                                                                                                                                      |                           |                                                                                                                                                                       |  |  |  |  |  |  |
|                                                                          |                                                                                                                                      |                           |                                                                                                                                                                       |  |  |  |  |  |  |
| If the child has not fasted overnight, please reschedule the blood draw: |                                                                                                                                      |                           |                                                                                                                                                                       |  |  |  |  |  |  |
| 04                                                                       | Time of blood collection:                                                                                                            | Time (24 Hr Scale; HH:MM) | <table border="1"><tr><td></td><td></td></tr></table> : <table border="1"><tr><td></td><td></td></tr></table>                                                         |  |  |  |  |  |  |
|                                                                          |                                                                                                                                      |                           |                                                                                                                                                                       |  |  |  |  |  |  |
|                                                                          |                                                                                                                                      |                           |                                                                                                                                                                       |  |  |  |  |  |  |
| 05                                                                       | Tube with <b>up to 2mL</b> blood collected?                                                                                          | Yes=01<br>No=00           | <table border="1"><tr><td></td><td></td></tr></table>                                                                                                                 |  |  |  |  |  |  |
|                                                                          |                                                                                                                                      |                           |                                                                                                                                                                       |  |  |  |  |  |  |
| 06                                                                       | Notes:                                                                                                                               |                           |                                                                                                                                                                       |  |  |  |  |  |  |

*Blood samples should be labeled as follows:* Study code + site code + participant code + timepoint + replicate identifier (A or B) e.g. SBT-ZAM1-P1-T60-A

Child ID Code:

|  |  |  |  |  |  |  |  |
|--|--|--|--|--|--|--|--|
|  |  |  |  |  |  |  |  |
|--|--|--|--|--|--|--|--|

| Blood Sample Reception <b>Version 1.0</b> |                                              |                                 |                                                                                                               |  |   |   |  |  |   |  |  |
|-------------------------------------------|----------------------------------------------|---------------------------------|---------------------------------------------------------------------------------------------------------------|--|---|---|--|--|---|--|--|
|                                           | Question                                     | Code                            | Response                                                                                                      |  |   |   |  |  |   |  |  |
| 01                                        | Study researcher/ Nurse/ Fieldworker ID      |                                 | <table border="1"><tr><td></td><td></td><td></td></tr></table>                                                |  |   |   |  |  |   |  |  |
|                                           |                                              |                                 |                                                                                                               |  |   |   |  |  |   |  |  |
| 02                                        | Date of blood collection (DD/MMM/YY)         |                                 | <table border="1"><tr><td></td><td></td><td>/</td><td></td><td></td><td>/</td><td></td><td></td></tr></table> |  |   | / |  |  | / |  |  |
|                                           |                                              | /                               |                                                                                                               |  | / |   |  |  |   |  |  |
| 03                                        | Date of blood arrival in laboratory          |                                 | <table border="1"><tr><td></td><td></td><td>/</td><td></td><td></td><td>/</td><td></td><td></td></tr></table> |  |   | / |  |  | / |  |  |
|                                           |                                              | /                               |                                                                                                               |  | / |   |  |  |   |  |  |
| 04                                        | Time of arrival                              | Time (24 Hr Scale; HH:MM)       | <table border="1"><tr><td></td><td></td><td>:</td><td></td><td></td></tr></table>                             |  |   | : |  |  |   |  |  |
|                                           |                                              | :                               |                                                                                                               |  |   |   |  |  |   |  |  |
| 05                                        | Tube 1 with <b>up to 2mL</b> blood received? | Yes=01<br>No=00                 | <table border="1"><tr><td></td><td></td></tr></table>                                                         |  |   |   |  |  |   |  |  |
|                                           |                                              |                                 |                                                                                                               |  |   |   |  |  |   |  |  |
| 06                                        | Evidence of hemolysis?                       | No=00<br>Slight=01<br>Severe=02 | <table border="1"><tr><td></td><td></td></tr></table>                                                         |  |   |   |  |  |   |  |  |
|                                           |                                              |                                 |                                                                                                               |  |   |   |  |  |   |  |  |
| 07                                        | Sample ID:                                   |                                 |                                                                                                               |  |   |   |  |  |   |  |  |
| 08                                        | Date of Centrifugation:                      |                                 | <table border="1"><tr><td></td><td></td><td>/</td><td></td><td></td><td>/</td><td></td><td></td></tr></table> |  |   | / |  |  | / |  |  |
|                                           |                                              | /                               |                                                                                                               |  | / |   |  |  |   |  |  |
| 09                                        | Time of Centrifugation:                      | Time<br>(24 Hr Scale; HH:MM)    | <table border="1"><tr><td></td><td></td><td>:</td><td></td><td></td></tr></table>                             |  |   | : |  |  |   |  |  |
|                                           |                                              | :                               |                                                                                                               |  |   |   |  |  |   |  |  |
| 10                                        | Number of 500µL Plasma Aliquots:             | 00-03                           | <table border="1"><tr><td></td><td></td></tr></table>                                                         |  |   |   |  |  |   |  |  |
|                                           |                                              |                                 |                                                                                                               |  |   |   |  |  |   |  |  |
| 06                                        | Notes:                                       |                                 |                                                                                                               |  |   |   |  |  |   |  |  |

*Blood samples should be labeled as follows:* Study code + site code + participant code + timepoint + replicate identifier (A or B) e.g. SBT-ZAM1-P1-T60-A

Child ID Code:

|  |  |  |  |  |  |  |  |
|--|--|--|--|--|--|--|--|
|  |  |  |  |  |  |  |  |
|--|--|--|--|--|--|--|--|

| Enrollment Form <b>Version 1.1</b>                                                                                                                                       |                                                                                                                           |                                                                                                                                                                                                                                                           |                                                                                                               |  |   |   |   |  |   |  |  |
|--------------------------------------------------------------------------------------------------------------------------------------------------------------------------|---------------------------------------------------------------------------------------------------------------------------|-----------------------------------------------------------------------------------------------------------------------------------------------------------------------------------------------------------------------------------------------------------|---------------------------------------------------------------------------------------------------------------|--|---|---|---|--|---|--|--|
|                                                                                                                                                                          | Question                                                                                                                  | Code                                                                                                                                                                                                                                                      | Response                                                                                                      |  |   |   |   |  |   |  |  |
| 01                                                                                                                                                                       | Study researcher/Nurse/Fieldworker ID                                                                                     |                                                                                                                                                                                                                                                           | <table border="1"><tr><td></td><td></td><td></td></tr></table>                                                |  |   |   |   |  |   |  |  |
|                                                                                                                                                                          |                                                                                                                           |                                                                                                                                                                                                                                                           |                                                                                                               |  |   |   |   |  |   |  |  |
| 02                                                                                                                                                                       | Today's date (DD/MMM/YY)                                                                                                  |                                                                                                                                                                                                                                                           | <table border="1"><tr><td></td><td></td><td>/</td><td></td><td></td><td>/</td><td></td><td></td></tr></table> |  |   | / |   |  | / |  |  |
|                                                                                                                                                                          |                                                                                                                           | /                                                                                                                                                                                                                                                         |                                                                                                               |  | / |   |   |  |   |  |  |
| <b>A. Child information and anthropometry</b>                                                                                                                            |                                                                                                                           |                                                                                                                                                                                                                                                           |                                                                                                               |  |   |   |   |  |   |  |  |
| 01                                                                                                                                                                       | Date of birth (DD/MMM/YY)                                                                                                 |                                                                                                                                                                                                                                                           | <table border="1"><tr><td></td><td></td><td>/</td><td></td><td></td><td>/</td><td></td><td></td></tr></table> |  |   | / |   |  | / |  |  |
|                                                                                                                                                                          |                                                                                                                           | /                                                                                                                                                                                                                                                         |                                                                                                               |  | / |   |   |  |   |  |  |
| 02                                                                                                                                                                       | Sex of child                                                                                                              | Male=01<br>Female=02                                                                                                                                                                                                                                      | <table border="1"><tr><td></td><td></td></tr></table>                                                         |  |   |   |   |  |   |  |  |
|                                                                                                                                                                          |                                                                                                                           |                                                                                                                                                                                                                                                           |                                                                                                               |  |   |   |   |  |   |  |  |
| 03                                                                                                                                                                       | Birthweight (kg) *<br>(from birth record, if available)                                                                   |                                                                                                                                                                                                                                                           | <table border="1"><tr><td></td><td></td><td>.</td><td></td><td></td></tr></table>                             |  |   | . |   |  |   |  |  |
|                                                                                                                                                                          |                                                                                                                           | .                                                                                                                                                                                                                                                         |                                                                                                               |  |   |   |   |  |   |  |  |
| 04                                                                                                                                                                       | Current weight (kg) *                                                                                                     |                                                                                                                                                                                                                                                           | <table border="1"><tr><td></td><td></td><td>.</td><td></td><td></td></tr></table>                             |  |   | . |   |  |   |  |  |
|                                                                                                                                                                          |                                                                                                                           | .                                                                                                                                                                                                                                                         |                                                                                                               |  |   |   |   |  |   |  |  |
| 05                                                                                                                                                                       | Current length (cm)                                                                                                       |                                                                                                                                                                                                                                                           | <table border="1"><tr><td></td><td></td><td>.</td><td></td></tr></table>                                      |  |   | . |   |  |   |  |  |
|                                                                                                                                                                          |                                                                                                                           | .                                                                                                                                                                                                                                                         |                                                                                                               |  |   |   |   |  |   |  |  |
| 06                                                                                                                                                                       | Current head circumference (cm)                                                                                           |                                                                                                                                                                                                                                                           | <table border="1"><tr><td></td><td></td><td>.</td><td></td></tr></table>                                      |  |   | . |   |  |   |  |  |
|                                                                                                                                                                          |                                                                                                                           | .                                                                                                                                                                                                                                                         |                                                                                                               |  |   |   |   |  |   |  |  |
| <b>B. Maternal anthropometry</b>                                                                                                                                         |                                                                                                                           |                                                                                                                                                                                                                                                           |                                                                                                               |  |   |   |   |  |   |  |  |
| 01                                                                                                                                                                       | Mother's date of birth                                                                                                    |                                                                                                                                                                                                                                                           | <table border="1"><tr><td></td><td></td><td>/</td><td></td><td></td><td>/</td><td></td><td></td></tr></table> |  |   | / |   |  | / |  |  |
|                                                                                                                                                                          |                                                                                                                           | /                                                                                                                                                                                                                                                         |                                                                                                               |  | / |   |   |  |   |  |  |
| 02                                                                                                                                                                       | Is the mother currently pregnant?                                                                                         | Yes = 01<br>No = 00                                                                                                                                                                                                                                       | <table border="1"><tr><td></td><td></td></tr></table>                                                         |  |   |   |   |  |   |  |  |
|                                                                                                                                                                          |                                                                                                                           |                                                                                                                                                                                                                                                           |                                                                                                               |  |   |   |   |  |   |  |  |
| 03                                                                                                                                                                       | Mother's Weight (kg)                                                                                                      |                                                                                                                                                                                                                                                           | <table border="1"><tr><td></td><td></td><td></td><td>.</td><td></td><td></td></tr></table>                    |  |   |   | . |  |   |  |  |
|                                                                                                                                                                          |                                                                                                                           |                                                                                                                                                                                                                                                           | .                                                                                                             |  |   |   |   |  |   |  |  |
| 04                                                                                                                                                                       | Mother's Height (cm)                                                                                                      |                                                                                                                                                                                                                                                           | <table border="1"><tr><td></td><td></td><td></td><td>.</td><td></td></tr></table>                             |  |   |   | . |  |   |  |  |
|                                                                                                                                                                          |                                                                                                                           |                                                                                                                                                                                                                                                           | .                                                                                                             |  |   |   |   |  |   |  |  |
| <b>C. Socio-economic Information (WAMI)</b>                                                                                                                              |                                                                                                                           |                                                                                                                                                                                                                                                           |                                                                                                               |  |   |   |   |  |   |  |  |
| <i>Please explain to the mother that these questions are standardized questions used around the world, so some questions may be more applicable to them than others.</i> |                                                                                                                           |                                                                                                                                                                                                                                                           |                                                                                                               |  |   |   |   |  |   |  |  |
| 01                                                                                                                                                                       | Was this child chosen for participation in the study because they come from a low-SES community, or a high SES community? | Low SES= 01<br>High SES = 02                                                                                                                                                                                                                              | <table border="1"><tr><td></td><td></td></tr></table>                                                         |  |   |   |   |  |   |  |  |
|                                                                                                                                                                          |                                                                                                                           |                                                                                                                                                                                                                                                           |                                                                                                               |  |   |   |   |  |   |  |  |
| 02                                                                                                                                                                       | What is the main source of drinking water for members of your household?                                                  | Piped into dwelling = 01<br>Piped to yard/plot = 02<br>Public tap/stand pipe= 03<br>Tube well or borehole = 04<br>Protected well = 05<br>Unprotected well = 06<br>Surface water (river/ dam/ lake/pond/ stream/canal/irrigation canal) = 07<br>Other = 08 | <table border="1"><tr><td></td><td></td></tr></table>                                                         |  |   |   |   |  |   |  |  |
|                                                                                                                                                                          |                                                                                                                           |                                                                                                                                                                                                                                                           |                                                                                                               |  |   |   |   |  |   |  |  |
| 02a                                                                                                                                                                      | If other, describe:                                                                                                       |                                                                                                                                                                                                                                                           |                                                                                                               |  |   |   |   |  |   |  |  |
| 03                                                                                                                                                                       | What is the main source of water used by your household for other purposes such as cooking and hand-washing?              | Piped into dwelling = 01<br>Piped to yard/plot = 02<br>Public tap/stand pipe= 03<br>Tube well or borehole = 04<br>Protected well = 05<br>Unprotected well = 06<br>Surface water (river/ dam/ lake/pond/ stream/canal/irrigation canal) = 07               | <table border="1"><tr><td></td><td></td></tr></table>                                                         |  |   |   |   |  |   |  |  |
|                                                                                                                                                                          |                                                                                                                           |                                                                                                                                                                                                                                                           |                                                                                                               |  |   |   |   |  |   |  |  |



Child ID Code:

|  |  |  |  |  |  |  |  |
|--|--|--|--|--|--|--|--|
|  |  |  |  |  |  |  |  |
|--|--|--|--|--|--|--|--|

|     |                                                                                                      |                                                                                                                                                                                                                            |                                                                                                             |  |  |  |  |  |  |  |  |
|-----|------------------------------------------------------------------------------------------------------|----------------------------------------------------------------------------------------------------------------------------------------------------------------------------------------------------------------------------|-------------------------------------------------------------------------------------------------------------|--|--|--|--|--|--|--|--|
| 03a | If other, describe:                                                                                  | Other = 08                                                                                                                                                                                                                 |                                                                                                             |  |  |  |  |  |  |  |  |
| 04  | What kind of toilet facility do members of your household usually use?                               | No facility/bush/field or bucket toilet = 01<br>Pit latrine without flush = 02<br>Flush to piped sewer system = 03<br>Flush to septic tank = 04<br>Flush to pit latrine = 05<br>Flush to somewhere else = 06<br>Other = 07 | <table border="1"><tr><td></td><td></td></tr></table>                                                       |  |  |  |  |  |  |  |  |
|     |                                                                                                      |                                                                                                                                                                                                                            |                                                                                                             |  |  |  |  |  |  |  |  |
| 04a | If other, describe:                                                                                  |                                                                                                                                                                                                                            |                                                                                                             |  |  |  |  |  |  |  |  |
| 05  | Do you have a separate room which is used as a kitchen?                                              | Yes = 01<br>No = 00                                                                                                                                                                                                        | <table border="1"><tr><td></td><td></td></tr></table>                                                       |  |  |  |  |  |  |  |  |
|     |                                                                                                      |                                                                                                                                                                                                                            |                                                                                                             |  |  |  |  |  |  |  |  |
| 06  | Does any member of your household have a bank account?                                               | Yes = 01<br>No = 00                                                                                                                                                                                                        | <table border="1"><tr><td></td><td></td></tr></table>                                                       |  |  |  |  |  |  |  |  |
|     |                                                                                                      |                                                                                                                                                                                                                            |                                                                                                             |  |  |  |  |  |  |  |  |
| 07  | Does your household have a mattress?                                                                 | Yes = 01<br>No = 00                                                                                                                                                                                                        | <table border="1"><tr><td></td><td></td></tr></table>                                                       |  |  |  |  |  |  |  |  |
|     |                                                                                                      |                                                                                                                                                                                                                            |                                                                                                             |  |  |  |  |  |  |  |  |
| 08  | Does your household have a refrigerator?                                                             | Yes = 01<br>No = 00                                                                                                                                                                                                        | <table border="1"><tr><td></td><td></td></tr></table>                                                       |  |  |  |  |  |  |  |  |
|     |                                                                                                      |                                                                                                                                                                                                                            |                                                                                                             |  |  |  |  |  |  |  |  |
| 09  | Does your household have a television?                                                               | Yes = 01<br>No = 00                                                                                                                                                                                                        | <table border="1"><tr><td></td><td></td></tr></table>                                                       |  |  |  |  |  |  |  |  |
|     |                                                                                                      |                                                                                                                                                                                                                            |                                                                                                             |  |  |  |  |  |  |  |  |
| 10  | Does your household have a table?                                                                    | Yes = 01<br>No = 00                                                                                                                                                                                                        | <table border="1"><tr><td></td><td></td></tr></table>                                                       |  |  |  |  |  |  |  |  |
|     |                                                                                                      |                                                                                                                                                                                                                            |                                                                                                             |  |  |  |  |  |  |  |  |
| 11  | Does your household have a chair or bench?                                                           | Yes = 01<br>No = 00                                                                                                                                                                                                        | <table border="1"><tr><td></td><td></td></tr></table>                                                       |  |  |  |  |  |  |  |  |
|     |                                                                                                      |                                                                                                                                                                                                                            |                                                                                                             |  |  |  |  |  |  |  |  |
| 12  | How many rooms are there in your house?                                                              | Yes = 01<br>No = 00                                                                                                                                                                                                        | <table border="1"><tr><td></td><td></td></tr></table>                                                       |  |  |  |  |  |  |  |  |
|     |                                                                                                      |                                                                                                                                                                                                                            |                                                                                                             |  |  |  |  |  |  |  |  |
| 13  | How many people usually sleep in this household?                                                     | 01-30 (people)                                                                                                                                                                                                             | <table border="1"><tr><td></td><td></td></tr></table>                                                       |  |  |  |  |  |  |  |  |
|     |                                                                                                      |                                                                                                                                                                                                                            |                                                                                                             |  |  |  |  |  |  |  |  |
| 14  | Have you (the mother of the study child) ever attended school?<br><i>If no, skip to question 18.</i> | Yes = 01<br>No = 00                                                                                                                                                                                                        | <table border="1"><tr><td></td><td></td></tr></table>                                                       |  |  |  |  |  |  |  |  |
|     |                                                                                                      |                                                                                                                                                                                                                            |                                                                                                             |  |  |  |  |  |  |  |  |
| 15  | How many years of schooling have you completed?                                                      | 00-20                                                                                                                                                                                                                      | <table border="1"><tr><td></td><td></td></tr></table>                                                       |  |  |  |  |  |  |  |  |
|     |                                                                                                      |                                                                                                                                                                                                                            |                                                                                                             |  |  |  |  |  |  |  |  |
| 16  | <i>If younger than 25 years old:</i> Are you currently attending school or college?                  | Yes = 01; No = 00                                                                                                                                                                                                          | <table border="1"><tr><td></td><td></td></tr></table>                                                       |  |  |  |  |  |  |  |  |
|     |                                                                                                      |                                                                                                                                                                                                                            |                                                                                                             |  |  |  |  |  |  |  |  |
| 17  | What is the average monthly income for the entire household?                                         |                                                                                                                                                                                                                            | <table border="1"><tr><td></td><td></td><td></td><td></td><td></td><td></td><td></td><td></td></tr></table> |  |  |  |  |  |  |  |  |
|     |                                                                                                      |                                                                                                                                                                                                                            |                                                                                                             |  |  |  |  |  |  |  |  |
| 18  | Currency                                                                                             | I = Indian rupees; J = Jamaica dollars;<br>K = Zambian kwacha; P = Peruvian soles;<br>S = Kenyan Shilling; T = taka                                                                                                        | <table border="1"><tr><td></td></tr></table>                                                                |  |  |  |  |  |  |  |  |
|     |                                                                                                      |                                                                                                                                                                                                                            |                                                                                                             |  |  |  |  |  |  |  |  |

**D. Child's dietary diversity**

|     |                                                                               |                     |                                                       |  |  |
|-----|-------------------------------------------------------------------------------|---------------------|-------------------------------------------------------|--|--|
| 01  | Are you breastfeeding <CHILD>?<br>If NO, then skip to Q.6                     | Yes = 01<br>No = 00 | <table border="1"><tr><td></td><td></td></tr></table> |  |  |
|     |                                                                               |                     |                                                       |  |  |
| 01a | Last night, how many times did you breastfeed <CHILD> from sunset to sunrise? | 00-99               | <table border="1"><tr><td></td><td></td></tr></table> |  |  |
|     |                                                                               |                     |                                                       |  |  |
| 01b | Yesterday, during the day, how many times did you breastfeed <CHILD>?         | 00-99               | <table border="1"><tr><td></td><td></td></tr></table> |  |  |
|     |                                                                               |                     |                                                       |  |  |
| 02  | Do you give <CHILD> infant formula? If NO, then skip to Q.9                   | Yes = 01<br>No = 00 | <table border="1"><tr><td></td><td></td></tr></table> |  |  |
|     |                                                                               |                     |                                                       |  |  |

Child ID Code:

|  |  |  |  |  |  |  |
|--|--|--|--|--|--|--|
|  |  |  |  |  |  |  |
|--|--|--|--|--|--|--|

|                                                                                                                                                             |                                                                                                                                                     |                     |                                                       |  |  |
|-------------------------------------------------------------------------------------------------------------------------------------------------------------|-----------------------------------------------------------------------------------------------------------------------------------------------------|---------------------|-------------------------------------------------------|--|--|
| 02a                                                                                                                                                         | Last night, how many times did you feed <CHILD> formula from sunset to sunrise?                                                                     | 00-99               | <table border="1"><tr><td></td><td></td></tr></table> |  |  |
|                                                                                                                                                             |                                                                                                                                                     |                     |                                                       |  |  |
| 02b                                                                                                                                                         | Yesterday, during the day, how many times did you feed <CHILD> formula?                                                                             | 00-99               | <table border="1"><tr><td></td><td></td></tr></table> |  |  |
|                                                                                                                                                             |                                                                                                                                                     |                     |                                                       |  |  |
| 03                                                                                                                                                          | Do you give <CHILD> other milks, such as tinned, powdered or fresh animal milk? If NO, then skip to Q.12                                            | Yes = 01<br>No = 00 | <table border="1"><tr><td></td><td></td></tr></table> |  |  |
|                                                                                                                                                             |                                                                                                                                                     |                     |                                                       |  |  |
| 03a                                                                                                                                                         | Last night, how many times did you feed <CHILD> animal milks from sunset to sunrise?                                                                | 00-99               | <table border="1"><tr><td></td><td></td></tr></table> |  |  |
|                                                                                                                                                             |                                                                                                                                                     |                     |                                                       |  |  |
| 03b                                                                                                                                                         | Yesterday, during the day, how many times did you feed <CHILD> animal milk?                                                                         | 00-99               | <table border="1"><tr><td></td><td></td></tr></table> |  |  |
|                                                                                                                                                             |                                                                                                                                                     |                     |                                                       |  |  |
| <i>Yesterday, during the day or last night, did &lt;CHILD&gt; have:</i>                                                                                     |                                                                                                                                                     |                     |                                                       |  |  |
| 04                                                                                                                                                          | Plain water                                                                                                                                         | Yes = 01<br>No = 00 | <table border="1"><tr><td></td><td></td></tr></table> |  |  |
|                                                                                                                                                             |                                                                                                                                                     |                     |                                                       |  |  |
| 05                                                                                                                                                          | Tea, coffee <local examples>?                                                                                                                       | Yes = 01<br>No = 00 | <table border="1"><tr><td></td><td></td></tr></table> |  |  |
|                                                                                                                                                             |                                                                                                                                                     |                     |                                                       |  |  |
| 06                                                                                                                                                          | Fruit or vegetable juices?                                                                                                                          | Yes = 01<br>No = 00 | <table border="1"><tr><td></td><td></td></tr></table> |  |  |
|                                                                                                                                                             |                                                                                                                                                     |                     |                                                       |  |  |
| 07                                                                                                                                                          | Any other liquids, such as sugar water, thin soup or broth, carbonated drinks <local examples>                                                      | Yes = 01<br>No = 00 | <table border="1"><tr><td></td><td></td></tr></table> |  |  |
|                                                                                                                                                             |                                                                                                                                                     |                     |                                                       |  |  |
| 08                                                                                                                                                          | Is <CHILD> eating any semi-solid, mashed or solid foods? If NO, go to Q24                                                                           | Yes = 01<br>No = 00 | <table border="1"><tr><td></td><td></td></tr></table> |  |  |
|                                                                                                                                                             |                                                                                                                                                     |                     |                                                       |  |  |
| <i>Thinking about yesterday, during the day and at night, did &lt;CHILD&gt; have any of these foods, even if they were in combination with other foods?</i> |                                                                                                                                                     |                     |                                                       |  |  |
| 09                                                                                                                                                          | Maize?                                                                                                                                              | Yes = 01<br>No = 00 | <table border="1"><tr><td></td><td></td></tr></table> |  |  |
|                                                                                                                                                             |                                                                                                                                                     |                     |                                                       |  |  |
| 10                                                                                                                                                          | Sorghum?                                                                                                                                            | Yes = 01<br>No = 00 | <table border="1"><tr><td></td><td></td></tr></table> |  |  |
|                                                                                                                                                             |                                                                                                                                                     |                     |                                                       |  |  |
| 11                                                                                                                                                          | Millet (any kind)?                                                                                                                                  | Yes = 01<br>No = 00 | <table border="1"><tr><td></td><td></td></tr></table> |  |  |
|                                                                                                                                                             |                                                                                                                                                     |                     |                                                       |  |  |
| 12                                                                                                                                                          | Sugar cane or cane-derived sugar                                                                                                                    | Yes = 01<br>No = 00 | <table border="1"><tr><td></td><td></td></tr></table> |  |  |
|                                                                                                                                                             |                                                                                                                                                     |                     |                                                       |  |  |
| 13                                                                                                                                                          | Rice, porridge, bread, noodles or other foods made from grains? (do not include foods made from maize, sorghum, or millet) Mention <local examples> | Yes = 01<br>No = 00 | <table border="1"><tr><td></td><td></td></tr></table> |  |  |
|                                                                                                                                                             |                                                                                                                                                     |                     |                                                       |  |  |
| 14                                                                                                                                                          | White potatoes, white yams, manioc, or other foods made from roots? Mention <local examples>                                                        | Yes = 01<br>No = 00 | <table border="1"><tr><td></td><td></td></tr></table> |  |  |
|                                                                                                                                                             |                                                                                                                                                     |                     |                                                       |  |  |

Child ID Code:

|  |  |  |  |  |  |  |
|--|--|--|--|--|--|--|
|  |  |  |  |  |  |  |
|--|--|--|--|--|--|--|

|    |                                                                                                                                       |                                                  |                                                       |  |  |
|----|---------------------------------------------------------------------------------------------------------------------------------------|--------------------------------------------------|-------------------------------------------------------|--|--|
| 15 | Carrots, squash, or sweet potatoes that are yellow or orange inside? Mention <local examples>                                         | Yes = 01<br>No = 00                              | <table border="1"><tr><td></td><td></td></tr></table> |  |  |
|    |                                                                                                                                       |                                                  |                                                       |  |  |
| 16 | Any dark green leafy vegetables such as spinach? Mention <local examples>                                                             | Yes = 01<br>No = 00                              | <table border="1"><tr><td></td><td></td></tr></table> |  |  |
|    |                                                                                                                                       |                                                  |                                                       |  |  |
| 17 | Foods made with beans, lentils, peas, corn, ground nuts? Mention <local examples>                                                     | Yes = 01<br>No = 00                              | <table border="1"><tr><td></td><td></td></tr></table> |  |  |
|    |                                                                                                                                       |                                                  |                                                       |  |  |
| 18 | Ripe mangoes, papayas, or other sweet yellow/orange or red fruit? Mention <local examples>                                            | Yes = 01<br>No = 00                              | <table border="1"><tr><td></td><td></td></tr></table> |  |  |
|    |                                                                                                                                       |                                                  |                                                       |  |  |
| 19 | Any other fruits or vegetables such as banana, apple, oranges, tomatoes, avocado? Mention <local examples> (not including sugar cane) | Yes = 01<br>No = 00                              | <table border="1"><tr><td></td><td></td></tr></table> |  |  |
|    |                                                                                                                                       |                                                  |                                                       |  |  |
| 20 | Liver, kidney, heart or other organ meats? Mention <local examples>                                                                   | Yes = 01<br>No = 00                              | <table border="1"><tr><td></td><td></td></tr></table> |  |  |
|    |                                                                                                                                       |                                                  |                                                       |  |  |
| 21 | Any meat, such as chicken, beef, lamb, goat, duck (others)? Mention <local examples>                                                  | Yes = 01<br>No = 00                              | <table border="1"><tr><td></td><td></td></tr></table> |  |  |
|    |                                                                                                                                       |                                                  |                                                       |  |  |
| 22 | Eggs? Mention <local examples>                                                                                                        | Yes = 01<br>No = 00                              | <table border="1"><tr><td></td><td></td></tr></table> |  |  |
|    |                                                                                                                                       |                                                  |                                                       |  |  |
| 23 | Fresh or dried fish or shellfish? Mention <local examples>                                                                            | Yes = 01<br>No = 00                              | <table border="1"><tr><td></td><td></td></tr></table> |  |  |
|    |                                                                                                                                       |                                                  |                                                       |  |  |
| 24 | Cheese, yogurt or other dairy products? Mention <local examples>                                                                      | Yes = 01<br>No = 00                              | <table border="1"><tr><td></td><td></td></tr></table> |  |  |
|    |                                                                                                                                       |                                                  |                                                       |  |  |
| 25 | Any sugary foods such as pastries, cakes or biscuits? Mention <local examples>                                                        | Yes = 01<br>No = 00                              | <table border="1"><tr><td></td><td></td></tr></table> |  |  |
|    |                                                                                                                                       |                                                  |                                                       |  |  |
| 26 | Any commercially available foods for infants or young children? Mention <local examples>                                              | Yes = 01<br>No = 00                              | <table border="1"><tr><td></td><td></td></tr></table> |  |  |
|    |                                                                                                                                       |                                                  |                                                       |  |  |
| 27 | Yesterday, counting meals and snacks, how many times did you feed <CHILD>?                                                            | 00-99                                            | <table border="1"><tr><td></td><td></td></tr></table> |  |  |
|    |                                                                                                                                       |                                                  |                                                       |  |  |
| 28 | How would you describe your child's appetite? Would you say it is:                                                                    | 01=poor,<br>02=fair,<br>03=good,<br>04=very good | <table border="1"><tr><td></td><td></td></tr></table> |  |  |
|    |                                                                                                                                       |                                                  |                                                       |  |  |

**E. Food Security (HFIAS)**

|    |                                                                                                                                           |                                                        |                                                       |  |  |
|----|-------------------------------------------------------------------------------------------------------------------------------------------|--------------------------------------------------------|-------------------------------------------------------|--|--|
| 01 | In the past four weeks, did you worry that your household would not have enough food?                                                     | No = 00<br>Rarely = 01<br>Sometimes = 02<br>Often = 03 | <table border="1"><tr><td></td><td></td></tr></table> |  |  |
|    |                                                                                                                                           |                                                        |                                                       |  |  |
| 02 | In the past four weeks, were you or any household member not able to eat the kinds of foods you preferred because of a lack of resources? | No = 00<br>Rarely = 01<br>Sometimes = 02<br>Often = 03 | <table border="1"><tr><td></td><td></td></tr></table> |  |  |
|    |                                                                                                                                           |                                                        |                                                       |  |  |
| 03 | In the past four weeks, did you or any household member have to                                                                           | No = 00<br>Rarely = 01<br>Sometimes = 02<br>Often = 03 | <table border="1"><tr><td></td><td></td></tr></table> |  |  |
|    |                                                                                                                                           |                                                        |                                                       |  |  |

Child ID Code:

|  |  |  |  |  |  |  |  |
|--|--|--|--|--|--|--|--|
|  |  |  |  |  |  |  |  |
|--|--|--|--|--|--|--|--|

|                           |                                                                                                                                                                                  |                                                        |                                                                                                                                                                                                                                            |  |  |  |  |  |  |
|---------------------------|----------------------------------------------------------------------------------------------------------------------------------------------------------------------------------|--------------------------------------------------------|--------------------------------------------------------------------------------------------------------------------------------------------------------------------------------------------------------------------------------------------|--|--|--|--|--|--|
|                           | eat a limited variety of foods due to a lack of resources?                                                                                                                       |                                                        |                                                                                                                                                                                                                                            |  |  |  |  |  |  |
| 04                        | In the past four weeks, did you or any household member have to eat some foods that you really did not want to eat because of a lack of resources to obtain other types of food? | No = 00<br>Rarely = 01<br>Sometimes = 02<br>Often = 03 | <table border="1"><tr><td></td><td></td></tr></table>                                                                                                                                                                                      |  |  |  |  |  |  |
|                           |                                                                                                                                                                                  |                                                        |                                                                                                                                                                                                                                            |  |  |  |  |  |  |
| 05                        | In the past four weeks, did you or any household member have to eat a smaller meal than you felt you needed because there was not enough food?                                   | No = 00<br>Rarely = 01<br>Sometimes = 02<br>Often = 03 | <table border="1"><tr><td></td><td></td></tr></table>                                                                                                                                                                                      |  |  |  |  |  |  |
|                           |                                                                                                                                                                                  |                                                        |                                                                                                                                                                                                                                            |  |  |  |  |  |  |
| 06                        | In the past four weeks, did you or any other household member have to eat fewer meals in a day because there was not enough food?                                                | No = 00<br>Rarely = 01<br>Sometimes = 02<br>Often = 03 | <table border="1"><tr><td></td><td></td></tr></table>                                                                                                                                                                                      |  |  |  |  |  |  |
|                           |                                                                                                                                                                                  |                                                        |                                                                                                                                                                                                                                            |  |  |  |  |  |  |
| 07                        | In the past four weeks, was there ever no food to eat of any kind in your household because of lack of resources to get food?                                                    | No = 00<br>Rarely = 01<br>Sometimes = 02<br>Often = 03 | <table border="1"><tr><td></td><td></td></tr></table>                                                                                                                                                                                      |  |  |  |  |  |  |
|                           |                                                                                                                                                                                  |                                                        |                                                                                                                                                                                                                                            |  |  |  |  |  |  |
| 08                        | In the past four weeks, did you or any household member go to sleep at night hungry because there was not enough food?                                                           | No = 00<br>Rarely = 01<br>Sometimes = 02<br>Often = 03 | <table border="1"><tr><td></td><td></td></tr></table>                                                                                                                                                                                      |  |  |  |  |  |  |
|                           |                                                                                                                                                                                  |                                                        |                                                                                                                                                                                                                                            |  |  |  |  |  |  |
| 09                        | In the past four weeks, did you or any household member go a whole day and night without eating anything because there was not enough food?                                      | No = 00<br>Rarely = 01<br>Sometimes = 02<br>Often = 03 | <table border="1"><tr><td></td><td></td></tr></table>                                                                                                                                                                                      |  |  |  |  |  |  |
|                           |                                                                                                                                                                                  |                                                        |                                                                                                                                                                                                                                            |  |  |  |  |  |  |
| <b>F. Child Morbidity</b> |                                                                                                                                                                                  |                                                        |                                                                                                                                                                                                                                            |  |  |  |  |  |  |
| 01                        | Does the child have diarrhea today?                                                                                                                                              | Yes = 01<br>No = 00<br>Doesn't know = 88               | <table border="1"><tr><td></td><td></td></tr></table>                                                                                                                                                                                      |  |  |  |  |  |  |
|                           |                                                                                                                                                                                  |                                                        |                                                                                                                                                                                                                                            |  |  |  |  |  |  |
| 02                        | Over the past 1 week (including today), has your child had diarrhea?                                                                                                             | Yes = 01<br>No = 00<br>Doesn't know = 88               | <table border="1"><tr><td></td><td></td></tr></table>                                                                                                                                                                                      |  |  |  |  |  |  |
|                           |                                                                                                                                                                                  |                                                        |                                                                                                                                                                                                                                            |  |  |  |  |  |  |
| 03                        | If yes to 02, for how many days?                                                                                                                                                 | 01-07                                                  | <table border="1"><tr><td></td><td></td></tr></table>                                                                                                                                                                                      |  |  |  |  |  |  |
|                           |                                                                                                                                                                                  |                                                        |                                                                                                                                                                                                                                            |  |  |  |  |  |  |
| 04                        | Over the past 4 weeks (including today), has your child had diarrhea?                                                                                                            | Yes = 01<br>No = 00<br>Doesn't know = 88               | <table border="1"><tr><td></td><td></td></tr></table>                                                                                                                                                                                      |  |  |  |  |  |  |
|                           |                                                                                                                                                                                  |                                                        |                                                                                                                                                                                                                                            |  |  |  |  |  |  |
| 05                        | If yes to 04, how many separate episodes?                                                                                                                                        | 01-20<br>Doesn't know = 88                             | <table border="1"><tr><td></td><td></td></tr></table>                                                                                                                                                                                      |  |  |  |  |  |  |
|                           |                                                                                                                                                                                  |                                                        |                                                                                                                                                                                                                                            |  |  |  |  |  |  |
| 06                        | How many days per episode?<br><br><i>Note: Episodes must be separated by at least 2 days without diarrhea</i>                                                                    | 01-20<br>Doesn't know = 88                             | a. First episode <table border="1"><tr><td></td><td></td></tr></table> days<br>b. Second episode <table border="1"><tr><td></td><td></td></tr></table> days<br>c. Third episode <table border="1"><tr><td></td><td></td></tr></table> days |  |  |  |  |  |  |
|                           |                                                                                                                                                                                  |                                                        |                                                                                                                                                                                                                                            |  |  |  |  |  |  |
|                           |                                                                                                                                                                                  |                                                        |                                                                                                                                                                                                                                            |  |  |  |  |  |  |
|                           |                                                                                                                                                                                  |                                                        |                                                                                                                                                                                                                                            |  |  |  |  |  |  |

Child ID Code:

|  |  |  |  |  |  |  |
|--|--|--|--|--|--|--|
|  |  |  |  |  |  |  |
|--|--|--|--|--|--|--|

|                                                                                                                         |                                                                                                                                          |                                          |                                                                                                                                                                       |  |  |  |  |  |  |
|-------------------------------------------------------------------------------------------------------------------------|------------------------------------------------------------------------------------------------------------------------------------------|------------------------------------------|-----------------------------------------------------------------------------------------------------------------------------------------------------------------------|--|--|--|--|--|--|
| 07                                                                                                                      | In how many episodes was blood/pus/mucus seen?<br><br><i>(The total number of episodes)</i>                                              | 01-20<br>Doesn't know = 88               | <table border="1"><tr><td></td><td></td></tr></table>                                                                                                                 |  |  |  |  |  |  |
|                                                                                                                         |                                                                                                                                          |                                          |                                                                                                                                                                       |  |  |  |  |  |  |
| CHRONIC DIARRHEA (Change in consistency of stools with passing of loose or watery stools lasting for MORE THAN 14 days) |                                                                                                                                          |                                          |                                                                                                                                                                       |  |  |  |  |  |  |
| 08                                                                                                                      | Over the past 4 weeks (including today), has your child had diarrhea for MORE THAN 14 days?                                              | Yes = 01<br>No = 00<br>Doesn't know = 88 | <table border="1"><tr><td></td><td></td></tr></table>                                                                                                                 |  |  |  |  |  |  |
|                                                                                                                         |                                                                                                                                          |                                          |                                                                                                                                                                       |  |  |  |  |  |  |
| 09                                                                                                                      | Were there any hospitalizations in the last 4 weeks?<br><br><i>If no, skip to Q 2.12. If yes, record each hospitalization separately</i> | Yes = 01<br>No = 00<br>Doesn't know = 88 | <table border="1"><tr><td></td><td></td></tr></table>                                                                                                                 |  |  |  |  |  |  |
|                                                                                                                         |                                                                                                                                          |                                          |                                                                                                                                                                       |  |  |  |  |  |  |
| 09a                                                                                                                     | Date of first admission                                                                                                                  |                                          | <table border="1"><tr><td></td><td></td></tr></table> / <table border="1"><tr><td></td><td></td></tr></table> / <table border="1"><tr><td></td><td></td></tr></table> |  |  |  |  |  |  |
|                                                                                                                         |                                                                                                                                          |                                          |                                                                                                                                                                       |  |  |  |  |  |  |
|                                                                                                                         |                                                                                                                                          |                                          |                                                                                                                                                                       |  |  |  |  |  |  |
|                                                                                                                         |                                                                                                                                          |                                          |                                                                                                                                                                       |  |  |  |  |  |  |
| 09b                                                                                                                     | Diagnosis:                                                                                                                               |                                          |                                                                                                                                                                       |  |  |  |  |  |  |
| 09c                                                                                                                     | Date of second admission                                                                                                                 |                                          | <table border="1"><tr><td></td><td></td></tr></table> / <table border="1"><tr><td></td><td></td></tr></table> / <table border="1"><tr><td></td><td></td></tr></table> |  |  |  |  |  |  |
|                                                                                                                         |                                                                                                                                          |                                          |                                                                                                                                                                       |  |  |  |  |  |  |
|                                                                                                                         |                                                                                                                                          |                                          |                                                                                                                                                                       |  |  |  |  |  |  |
|                                                                                                                         |                                                                                                                                          |                                          |                                                                                                                                                                       |  |  |  |  |  |  |
| 09d                                                                                                                     | Diagnosis:                                                                                                                               |                                          |                                                                                                                                                                       |  |  |  |  |  |  |
| History of worm infestation                                                                                             |                                                                                                                                          |                                          |                                                                                                                                                                       |  |  |  |  |  |  |
| 10                                                                                                                      | Have you observed worms in your child's stools                                                                                           | Yes = 01<br>No = 00<br>Doesn't know = 88 | <table border="1"><tr><td></td><td></td></tr></table>                                                                                                                 |  |  |  |  |  |  |
|                                                                                                                         |                                                                                                                                          |                                          |                                                                                                                                                                       |  |  |  |  |  |  |
| 11                                                                                                                      | Has your child been treated for worm infestations in the last 6 months?                                                                  | Yes = 01<br>No = 00<br>Doesn't know = 88 | <table border="1"><tr><td></td><td></td></tr></table>                                                                                                                 |  |  |  |  |  |  |
|                                                                                                                         |                                                                                                                                          |                                          |                                                                                                                                                                       |  |  |  |  |  |  |
| 12                                                                                                                      | If yes, what is the medication taken? (ask for empty syrup bottle/ prescription for medicine details)                                    |                                          |                                                                                                                                                                       |  |  |  |  |  |  |
| 13                                                                                                                      | Is your child on regular deworming medication?                                                                                           | Yes = 01<br>No = 00<br>Doesn't know = 88 |                                                                                                                                                                       |  |  |  |  |  |  |

|    | Morbidities | Does child have symptom today?<br><sup>a</sup> |                             | If yes, how many days in past week including today?<br>(1-7)<br><sup>b</sup> | Has child had symptom in past 1 month?<br><sup>c</sup> |                              | If yes, how many episodes in the past month?<br>(1-28)<br><sup>d</sup> | Has child had symptom in past 3 months, if yes how many episodes?<br><sup>e</sup> |                                                       |  |  |
|----|-------------|------------------------------------------------|-----------------------------|------------------------------------------------------------------------------|--------------------------------------------------------|------------------------------|------------------------------------------------------------------------|-----------------------------------------------------------------------------------|-------------------------------------------------------|--|--|
| 14 | Common cold | <input type="checkbox"/> Yes                   | <input type="checkbox"/> No | <table border="1"><tr><td></td></tr></table>                                 |                                                        | <input type="checkbox"/> Yes | <input type="checkbox"/> No                                            |                                                                                   | <table border="1"><tr><td></td><td></td></tr></table> |  |  |
|    |             |                                                |                             |                                                                              |                                                        |                              |                                                                        |                                                                                   |                                                       |  |  |
|    |             |                                                |                             |                                                                              |                                                        |                              |                                                                        |                                                                                   |                                                       |  |  |
| 15 | Cough       | <input type="checkbox"/> Yes                   | <input type="checkbox"/> No | <table border="1"><tr><td></td></tr></table>                                 |                                                        | <input type="checkbox"/> Yes | <input type="checkbox"/> No                                            |                                                                                   | <table border="1"><tr><td></td><td></td></tr></table> |  |  |
|    |             |                                                |                             |                                                                              |                                                        |                              |                                                                        |                                                                                   |                                                       |  |  |
|    |             |                                                |                             |                                                                              |                                                        |                              |                                                                        |                                                                                   |                                                       |  |  |

Child ID Code:

|  |  |  |  |  |  |  |
|--|--|--|--|--|--|--|
|  |  |  |  |  |  |  |
|--|--|--|--|--|--|--|

|    |                         |                              |                             |                          |                              |                             |  |                                                   |
|----|-------------------------|------------------------------|-----------------------------|--------------------------|------------------------------|-----------------------------|--|---------------------------------------------------|
| 16 | Difficulty in breathing | <input type="checkbox"/> Yes | <input type="checkbox"/> No | <input type="checkbox"/> | <input type="checkbox"/> Yes | <input type="checkbox"/> No |  | <input type="checkbox"/> <input type="checkbox"/> |
| 17 | Fever                   | <input type="checkbox"/> Yes | <input type="checkbox"/> No | <input type="checkbox"/> | <input type="checkbox"/> Yes | <input type="checkbox"/> No |  | <input type="checkbox"/> <input type="checkbox"/> |
| 18 | Pus draining from ears  | <input type="checkbox"/> Yes | <input type="checkbox"/> No | <input type="checkbox"/> | <input type="checkbox"/> Yes | <input type="checkbox"/> No |  | <input type="checkbox"/> <input type="checkbox"/> |
| 19 | Vomiting                | <input type="checkbox"/> Yes | <input type="checkbox"/> No | <input type="checkbox"/> | <input type="checkbox"/> Yes | <input type="checkbox"/> No |  | <input type="checkbox"/> <input type="checkbox"/> |
| 20 | Rashes                  | <input type="checkbox"/> Yes | <input type="checkbox"/> No | <input type="checkbox"/> | <input type="checkbox"/> Yes | <input type="checkbox"/> No |  | <input type="checkbox"/> <input type="checkbox"/> |
| 21 | Convulsions             | <input type="checkbox"/> Yes | <input type="checkbox"/> No | <input type="checkbox"/> | <input type="checkbox"/> Yes | <input type="checkbox"/> No |  | <input type="checkbox"/> <input type="checkbox"/> |

Child ID Code: 

|  |  |  |  |  |  |  |
|--|--|--|--|--|--|--|
|  |  |  |  |  |  |  |
|--|--|--|--|--|--|--|

| 3 and 6-month Follow-up <b>Version 1.0</b> |                                       |      |                                                                                                                      |
|--------------------------------------------|---------------------------------------|------|----------------------------------------------------------------------------------------------------------------------|
|                                            | Question                              | Code | Response                                                                                                             |
| 01                                         | Study researcher/Nurse/Fieldworker ID |      | <div><div></div><div></div><div></div></div>                                                                         |
| 02                                         | Today's date (DD/MMM/YY)              |      | <div><div><div></div><div></div></div> / <div><div></div><div></div></div> / <div><div></div><div></div></div></div> |
| 03                                         | Current weight (kg)                   |      | <div><div><div></div><div></div></div> . <div><div></div><div></div></div></div>                                     |
| 04                                         | Current length (cm)                   |      | <div><div><div></div><div></div></div> . <div><div></div></div></div>                                                |
| 05                                         | Current head circumference (cm)       |      | <div><div><div></div><div></div></div> . <div><div></div></div></div>                                                |
